# BoxCar and library-free data-independent acquisition substantially improve the depth, range, and completeness of label-free quantitative proteomics in Arabidopsis

Devang Mehta<sup>1</sup>, Sabine Scandola<sup>1</sup> and R. Glen Uhrig<sup>1#</sup>

## Abstract

The last decade has seen significant advances in the application of quantitative mass spectrometry-based proteomics technologies to tackle important questions in plant biology. The current standard for quantitative proteomics in plants is the use of data-dependent acquisition (DDA) analysis with and without the use of chemical labels. However, major limitations of the DDA approach are the preferential measurement higher abundant proteins, and the presence of missing values for proteins measured across replicate and independent samples. Here, we systematically compare and benchmark a state-of-the-art DDA label-free quantitative proteomics workflow for plants against a recently developed direct data-independent acquisition (directDIA) method. Our study demonstrates several advantages of directDIA including a 33% increase in the number of quantified proteins and the elimination of bias against the reproducible quantification of low-abundant proteins—a particularly important finding given the large dynamic range of plant proteomes. We next compared directDIA with a novel approach combining MS<sup>1</sup>-level BoxCar acquisition with MS<sup>2</sup>-level library-free DIA analysis (BoxCarDIA). Our BoxCarDIA method resulted in an additional 8% increase in the number of proteins quantified over directDIA, with further gains in quantitative completeness. Cumulatively, the methods benchmarked here achieve a 41% increase in protein quantification without any changes in instrumentation, offline fractionation, or increases in mass-spectrometer run time. We also applied directDIA to perform a quantitative proteomic comparison of dark and light grown Arabidopsis cell cultures, providing a critical resource for future plant interactome studies using this well-established biochemistry platform. Our results establish BoxCarDIA and directDIA as the new methods of choice in quantitative proteomics using Orbitrap-type mass-spectrometers.

<sup>1</sup> Department of Biological Sciences, University of Alberta, Edmonton T6G 2E9, Alberta, Canada

<sup>#</sup>Correspondence  
Dr. R. Glen Uhrig  
[ruhrig@ualberta.ca](mailto:ruhrig@ualberta.ca)

### Keywords

Arabidopsis thaliana, cell culture, proteome, quantitative proteomics, data dependent acquisition, data independent acquisition, BoxCar, mass spectrometry

### Funding

This work was funded by the National Science and Engineering Research Council of Canada (NSERC) and the Canadian Foundation for Innovation (CFI).

## Introduction

The last decade has seen significant advances in the application of quantitative mass spectrometry-based proteomics technologies to tackle important questions in plant biology. This has included the use of both

34 label-based and label-free quantitative liquid-chromatography mass  
35 spectrometry (LC-MS) strategies in model<sup>1,2</sup> and non-model plants<sup>3</sup>. While  
36 chemical labelling-based workflows (e.g. iTRAQ and TMT) are generally  
37 considered to possess high quantitative accuracy, they nonetheless suffer  
38 from ratio distortion and sample interference issues<sup>4,5</sup>, while being less  
39 cost-effective and offering less throughput than label-free approaches.  
40 Consequently, label free quantification (LFQ) has been widely used in  
41 comparative quantitative experiments profiling the native<sup>6</sup> and post-  
42 translationally modified (PTM-ome)<sup>7,8</sup> proteomes of plants. However, LFQ  
43 shotgun proteomics studies in plants have so far, almost universally, used  
44 data-dependent acquisition (DDA) for tandem MS (MS/MS) analysis.

45 In a typical DDA workflow, elution groups of digested peptide ions  
46 (precursor ions) are first analysed at the MS<sup>1</sup> level using a high-resolution  
47 mass analyser (such as modern Orbitrap devices). Subsequently, selected  
48 precursor ions are isolated and fragmented, generating MS<sup>2</sup> spectra that  
49 deduce the sequence of the precursor peptide. For each MS<sup>1</sup> scan usually  
50 around 10–12 MS<sup>2</sup> scans are performed after which the instrument cycles to  
51 the next MS<sup>1</sup> scan and the cycle repeats. While this “TopN” approach enables  
52 identification of precursors spanning the entire mass range, the  
53 fragmentation of semi-stochastically selected precursor ions (generally,  
54 more intense ions) limits the reproducibility of individual DDA runs, results  
55 in missing values between replicate runs, and biases quantitation toward  
56 more abundant peptides<sup>9</sup>. This is particularly disadvantageous for label-  
57 free workflows and samples with a high protein dynamic range, such as  
58 human plasma and photosynthetic tissue.

59 In order to address these limitations, several data-independent acquisition  
60 (DIA) workflows have been pioneered, famously exemplified by Sequential  
61 Window Acquisition of All Theoretical Mass Spectra (SWATH-MS)<sup>10,11</sup>. In DIA  
62 workflows, specific, often overlapping, m/z windows spanning a defined  
63 mass range are used to sub-select groups of precursors for fragmentation  
64 and MS<sup>2</sup> analysis. As a result, complete fragmentation of all precursors in  
65 that window follows MS<sup>1</sup> scans resulting in a more reproducible and  
66 complete analysis. A major disadvantage of DIA workflows, however, is that  
67 each MS<sup>2</sup> scan contains multiplexed spectra from several precursor ions  
68 making accurate identification of peptides difficult. Traditionally, this has  
69 been addressed through the use of global or project-specific spectral-  
70 libraries obtained from a fractionated, high-resolution DDA survey of all  
71 samples—adding to experimental labour and instrumentation analysis  
72 time. More recently, alternative approaches have been developed that avoid  
73 the use of spectral libraries and instead use “pseudo-spectra” derived from  
74 DIA runs that are then searched in a spectrum-centric approach analogous  
75 to conventional DDA searches<sup>12–14</sup>. Improvements in such library-free DIA  
76 approaches have included the incorporation of high precision indexed  
77 Retention Time (iRT) prediction<sup>15</sup> and the use of deep-learning

78 approaches<sup>16–18</sup>. DirectDIA (an implementation of a library-free DIA  
79 method; Biognosys AG) and a hybrid (directDIA in combination with  
80 library-based DIA) approach has been recently used to quantify more than  
81 10,000 proteins in human tissue<sup>19</sup> and reproducibly identify >10,000  
82 phosphosites across hundreds of human retinal pigment epithelial-1 cell  
83 line samples<sup>20</sup>.

84 While DIA addresses the stochasticity of precursor selection for  
85 fragmentation, it does not solve the problem of incomplete MS<sup>1</sup> analysis due  
86 to the limited charge capacity of C-traps that lie upstream of Orbitraps. In  
87 effect this means that modern Orbitrap mass-spectrometers only analyse  
88 <1% of available ions at the MS<sup>1</sup> level<sup>21</sup>. In 2018, Meier et al., described a novel  
89 acquisition scheme called BoxCar where multiple overlapping sets of narrow  
90 m/z segments are scanned at the MS<sup>1</sup> level followed by conventional DDA-  
91 type MS<sup>2</sup> analysis<sup>21</sup>. It is thus reasonable to speculate that combining the  
92 power of BoxCar to produce higher-resolution MS<sup>1</sup> data with DIA-type MS<sup>2</sup>  
93 analysis (BoxCarDIA) may provide greater quantitative depth and range for  
94 shotgun proteomics.

95 DirectDIA combines the advantages of DIA for reproducible quantification  
96 of proteins in complex mixtures with high dynamic range, with the ease of  
97 use of earlier DDA methodologies. BoxCarDIA may improve MS<sup>1</sup> resolution  
98 and dynamic range, while addressing the limitations of DDA-type precursor  
99 fragmentation. Hence, a systematic comparison of these different  
100 technologies for LFQ proteomics is essential to define best practice in plant  
101 proteomics. In order to execute this analysis, we compared the proteomes of  
102 light- and dark-grown Arabidopsis suspension cells generated with DDA,  
103 directDIA and BoxCarDIA acquisition schemes. Arabidopsis suspension cells  
104 are a long-established platform for plant biochemistry and have recently  
105 seen a resurgence in popularity due to their utility in facilitating protein  
106 interactomic experimentation using technologies such as tandem affinity  
107 purification-mass spectrometry<sup>22–26</sup>, nucleic acid crosslinking<sup>27</sup>, and  
108 proximity labelling (e.g. TurboID)<sup>28</sup>. Despite this, no existing resource  
109 profiling the basal differences in proteomes of Arabidopsis cells grown in  
110 light or dark exists—a fundamental requirement to determine the choice of  
111 growth conditions to maximize the utility of protein interactomic  
112 experiments and targeted proteomic assays in this system.

## 113 **Results & Discussion**

114 We performed total protein extraction under denaturing conditions from  
115 Arabidopsis (cv. Ler) suspension cells grown for five days in either constant  
116 light or dark. Trypsin digestion of the extracted proteome was performed

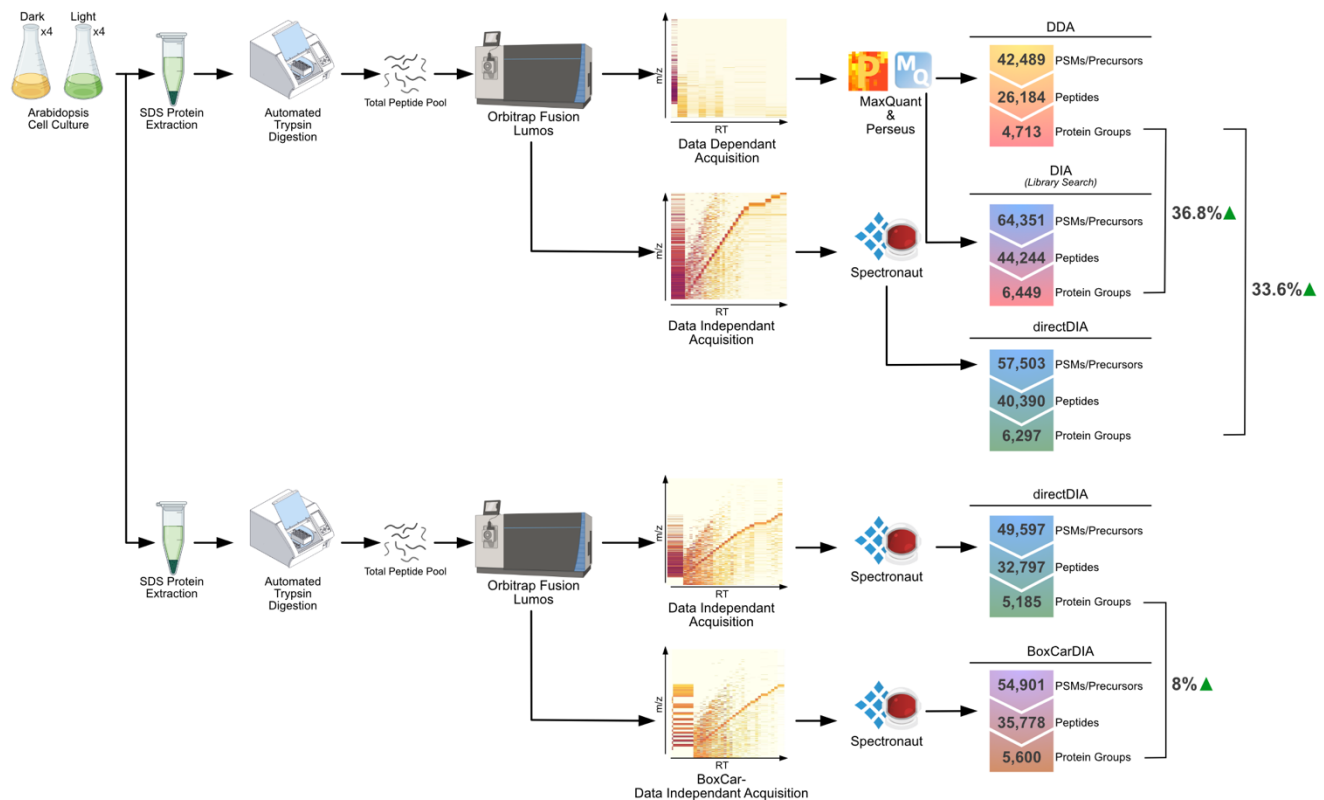

**Figure 1: Experimental workflow and summary results.**

Total protein was isolated from light and dark grown Arabidopsis cells under denaturing conditions for use in two experiments. In the first experiment, peptides were digested with trypsin, desalted and subjected to LC-MS/MS using two different acquisition modes. Ion maps showing a single MS1 scan and subsequent MS2 scans are presented to illustrate differences in acquisition schemes. Raw data was analyzed using MaxQuant & Perseus for data-dependent acquisition (DDA) analysis and using Spectronaut for data-independent acquisition (DIA) analysis using spectral libraries created from both acquisitions, and for directDIA analysis without the use of spectral libraries. A second experiment involved analyzing independent digests of the same protein extracts followed by the same general analysis pipeline, in order to directly compare directDIA and library-free BoxCarDIA acquisition modes. Counts of FDR-filtered (0.01) peptide spectrum matches (PSMs)/precursors, peptides, and protein groups for each analysis type are shown. Percentage values for increases in protein group quantifications are shown alongside each analysis.

117  
118  
119  
120  
121  
122  
123  
124  
125  
126  
127  
128  
129  
130

using an automated sample preparation protocol, with 1ug of digested peptide subsequently analysed using an Orbitrap Fusion Lumos mass spectrometer operated in either DDA, DIA, or BoxCarDIA acquisition modes over 120-minute gradients. Two separate experiments were performed using independent digests of the extracted Arabidopsis proteins. The first to compare DDA and directDIA, and the second to compare directDIA with BoxCarDIA. Eight injections (4 light & 4 dark) per analysis (a total of 32 injections) were carried out. DDA data processing was performed using MaxQuant, while DIA data processing was performed using Spectronaut v14 (Biognosys AG). For DIA analysis, both hybrid (library+directDIA) and directDIA analysis was performed. The hybrid analysis was performed by first creating a spectral library from DDA raw files using the Pulsar search engine implemented in Spectronaut, followed by a peptide-centric DIA analysis with DIA raw output files. DirectDIA was performed directly on raw

131 DIA files as implemented in Spectronaut. The entire workflow is depicted in  
132 **Figure 1**. Both hybrid DIA and directDIA analysis substantially outperformed  
133 DDA analysis with an average of 65,351; 57,503; and 42,489 peptide-  
134 spectrum matches (precursors) quantified across all 8 samples for each  
135 analysis, respectively. Hybrid DIA and directDIA also displayed similar gains  
136 over DDA in terms of quantified peptides and protein groups (**Figure 1**).  
137 While hybrid DIA analysis performed marginally better than directDIA,  
138 further analysis was performed with the results of only direct DIA and DDA  
139 analyses in order to compare methods that use an equivalent number of MS  
140 raw input files, comparable instrumentation time and relatively comparable  
141 data analysis workflows. We also found substantial improvements in  
142 quantifying precursors, peptides, and protein groups using BoxCarDIA as  
143 compared to directDIA. Overall, our results suggest that library-free  
144 BoxCarDIA can increase quantitative depth by as much as 40% over  
145 conventional DDA methods with no increase in analysis time or change in  
146 instrumentation.

147 Next, we undertook a series of data analyses to compare the completeness,  
148 quality, and distribution of protein group-level quantification of the DDA  
149 and directDIA analyses. In order to compare quantification results across  
150 the different analysis types, raw intensity values for each sample were  $\log_2$   
151 transformed, median-normalized (per sample), and then averaged for each  
152 condition to produce a normalized protein abundance value. For DDA  
153 analysis, the number of proteins quantified was determined by first filtering  
154 for proteins with valid quantification values in at least 3 of 4 replicates in  
155 either condition (light or dark) and then imputing missing values using  
156 MaxQuant with standard parameters<sup>29,30</sup>. For directDIA and BoxCarDIA  
157 analyses, quantified proteins were defined as those passing standard Q-  
158 value filtering in Spectronaut. In total, DDA analysis resulted in the  
159 quantification of 4,837 proteins (both conditions) and directDIA analysis  
160 quantified 6,526 proteins (light) and 6,454 proteins (dark) (**Supplementary**  
161 **Tables 1-3**). Upon comparing the quantified proteins between both  
162 methods, we found that 4,599 proteins were quantified by both techniques,  
163 1,934 were quantified only by directDIA and 235 proteins were exclusively  
164 DDA-quantified, for light-grown cells (**Figure 2a**). A correlation plot of  
165 normalized quantification values for the 4,599 common proteins showed a  
166 moderate correlation between DDA and directDIA quantification  
167 (Spearman's  $R = 0.773$ ) (**Figure 2a**). Examining the frequency distribution of  
168 proteins quantified in light-grown cells, by both methods, revealed that the  
169 DDA results were substantially skewed towards higher abundant proteins  
170 compared to directDIA (**Figure 2b**). In order to investigate the overlap of  
171 quantified proteins between directDIA and DDA at extreme protein  
172 abundances, we sub-selected the 2%, 5%, 95% and 98% percentile of the  
173 combined quantification distribution and constructed UpSet plots<sup>31</sup> for these  
174 datasets. This analysis revealed that directDIA quantifies hundreds of more  
175 proteins at the lower extremes but is only marginally less effective than DDA

176  
177  
178  
179  
180  
181  
182  
183  
184  
185  
186  
187  
188  
189  
190  
191  
192  
193

at the upper extremes of the protein abundance distribution (**Figure 2c**). These results were similarly replicated for dark-grown cells, suggesting that this is a universal feature of the two acquisition methods, irrespective of sample treatment or type (**Figure 2 d-f**). In order to assess if this difference in quantification ability is specific to plant cells (that have a high dynamic range of protein levels), we further analysed a commercial HeLa cell digest standard using the same mass spectrometry and chromatography settings, with quadruplicate injections per analysis type. Analysing the HeLa quantification results (**Supplementary Tables 4 & 5**) showed a similarly uniform quantification across a wide range by directDIA and a slightly better, but still skewed, performance by DDA compared to Arabidopsis cells (**Figure S1 a & b**). Comparing the quantification values for HeLa proteins acquired by directDIA and DDA showed a stronger correlation than for Arabidopsis (Spearman's  $R=0.886$ ). Indeed, correlations between quantification values for lower abundant proteins (defined here as proteins below the median quant value), were much lower than for the overall dataset in both species, and yet slightly stronger in the case of HeLa proteins (**Figure S1 c-e**).

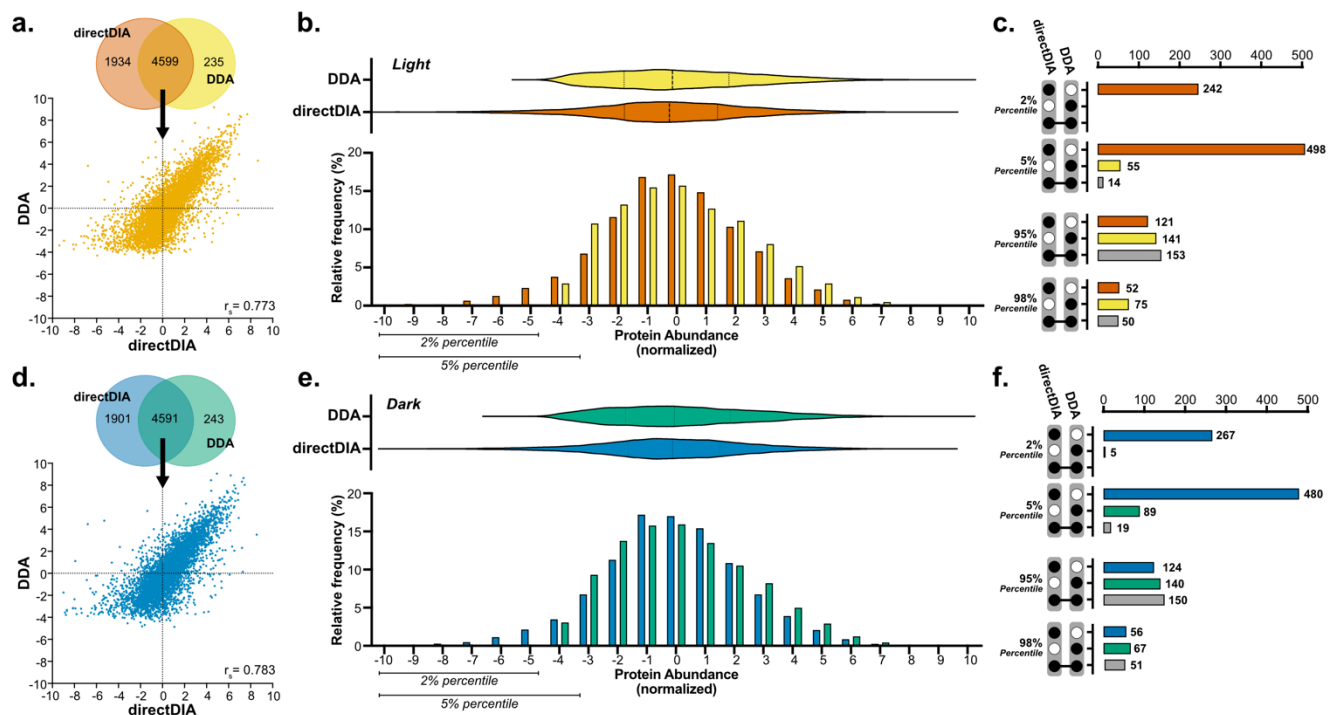

**Figure 2: Comparison of protein quantification results using DDA and direct DIA analysis for (a.-c.) light grown and (d.-f.) dark grown Arabidopsis cells.**

(a.) & (d.) Venn diagram of protein groups quantified with direct DIA and DDA and scatter plot of protein groups quantified by both methods.  $r_s$ : Spearman's correlation coefficient. (b.) & (e.) Frequency distribution of normalized protein abundances for DDA and direct DIA analysis and corresponding violin plots with median and quartile lines marked. (c.) & (f.) Upset plots depicting intersections in protein groups quantified by DDA and direct DIA at either extremes of the abundance distribution.

194  
195  
196  
197  
198  
199  
200  
201  
202  
203  
204  
205  
206  
207

We next performed similar comparative analyses for an independent experiment comparing directDIA and BoxCarDIA approaches (**Figure 3**). In this experiment, BoxCarDIA resulted in the quantification of 5,806 (light) and 5,791 (dark) proteins compared to 5,377 (light) and 5,354 (dark) using directDIA (**Supplementary Tables 6 & 7**). The relative abundance of proteins quantified in both analyses correlated to a large degree (Spearman's  $r \sim 0.92$ ; **Figure 3 a & d**), much more than the correlation between directDIA and DDA analyses (**Figure 2 a & d**). The frequency distributions of normalised abundances of proteins quantified by both directDIA and BoxCarDIA showed that BoxCarDIA is better able to quantify both high- and low-abundant proteins, for both light and dark grown cells (**Figure 3 b & e**). This is clearly evident upon UpSet plot visualization of the overlap between the two techniques at the extremes of the protein abundance distributions (**Figure 3 c & f**).

208  
209  
210  
211  
212  
213

In order to deduce the underlying factors limiting the ability of DDA to quantify low abundant proteins, especially in Arabidopsis cells, we next investigated quantification distributions for both DDA and directDIA derived data after various data-filtering steps (**Figure S2; Supplementary Tables 8-17**). We found that DDA was indeed able to identify a similar number of proteins as directDIA for both Arabidopsis cells and HeLa digests.

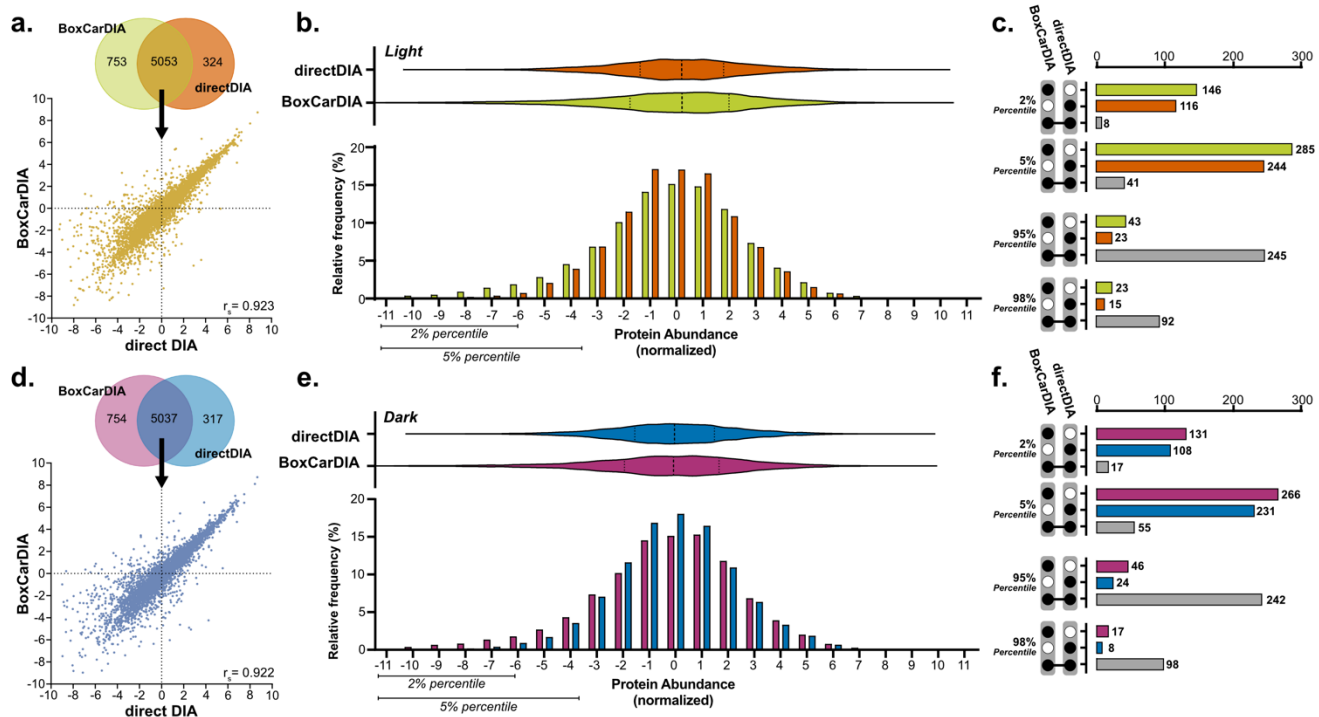

**Figure 3: Comparison of protein quantification results using directDIA and BoxCarDIA analysis for (a.-c.) light grown and (d.-f.) dark grown Arabidopsis cells.**

**(a.) & (d.)** Venn diagram of protein groups quantified with BoxCarDIA and directDIA, and scatter plot of protein groups quantified by both methods.  $r_s$ : Spearman's correlation coefficient. **(b.) & (e.)** Frequency distribution of normalized protein abundances for directDIA and BoxCarDIA analysis and corresponding violin plots with median and quartile lines marked. **(c.) & (f.)** Upset plots depicting intersections in protein groups quantified by directDIA and BoxCarDIA at either extreme of the abundance distribution.

214 Predictably these numbers dropped dramatically upon filtering proteins for  
215 only those with valid quantification values across 3 of 4 replicates, with only  
216 mild gains realized due to imputation of missing values. In contrast, even  
217 upon filtering for valid values across 4 of 4 replicates, directDIA resulted in  
218 the quantification of more than 5,400 proteins compared to 3,600 complete  
219 quantifications for DDA. Strikingly, quantification distributions remained  
220 unchanged regardless of various types of data-filtering for directDIA but  
221 were greatly skewed towards high abundance upon filtering for valid values  
222 in 3 of 4 replicates in DDA outputs (**Figure S2**). This suggests that the poor  
223 quantification of low abundant proteins is related to the presence of missing  
224 values in DDA analysis.

225 This hypothesis was reinforced when we distributed the protein  
226 quantification data for directDIA and DDA based on the number of replicates  
227 with valid quantification values for each protein (**Figure 4**). Here we found  
228 that the overwhelming majority (>95%) of proteins quantified by directDIA  
229 had valid values in at least 3 of 4 biological replicates for Arabidopsis cells  
230 grown in the light or dark (**Figure 4 a & b**). Unsurprisingly, in the HeLa  
231 digest, more than 98% of directDIA quantified proteins were accurately  
232 quantified in 4 of 4 technical injections. In contrast, only 68% and 74% of  
233 proteins were accurately quantified by DDA in 4 of 4 replicates of light and  
234 dark grown Arabidopsis cells, respectively. In fact, the distribution of  
235 protein quantification was bimodal, with as many as 17% of proteins  
236 accurately quantified in only 1 of 4 replicates by DDA in light-grown cells  
237 (10.9% in dark-grown cells). Nearly a quarter of proteins were accurately  
238 quantified by DDA in only 1 of 4 technical injections of the same HeLa cell  
239 digest, suggesting an inherent disadvantage in reproducibility across  
240 replicate runs. In contrast, no proteins were quantified in only 1 of 4  
241 technical injections of the same HeLa digest when using directDIA and  
242 99.4% were quantified in 4 of 4 technical replicates. When these  
243 distributions were further plotted against the normalized protein  
244 quantification values, it became clear that proteins found in a lower number  
245 of replicates trended lower in abundance in DDA, while this trend did not  
246 hold true for directDIA (**Figure 4 d-i**). In the case of directDIA, a greater  
247 number of quantified proteins were found in 1 of 4 or 2 of 4 biological  
248 replicates in Arabidopsis cells compared the technical replicates of HeLa  
249 digests. This suggests that the inconsistent quantification of some low  
250 abundant proteins using directDIA is a reflection of real biological variance  
251 rather than a methodological artefact. This is contrary to DDA where similar  
252 proportions of low abundant proteins were inconsistently identified across  
253 biological replicates of Arabidopsis cells and technical replicates of HeLa  
254 digests. Overall, this further reinforces that DDA acquisition results in  
255 inconsistent quantification between injections, and that this may in fact  
256 obscure real biological variance between samples, especially with regards to  
257 lower abundant proteins.



258  
259  
260  
261  
262  
263  
264  
265  
266  
267  
268

In order to assess whether BoxCarDIA could achieve further gains in quantitative completeness, we performed 4 technical replicate injections of HeLa digests using each, BoxCarDIA and directDIA acquisition. Similar to our previous analysis, the vast majority of proteins quantified by directDIA were found in all 4 replicates (Figure 5a; Supplementary Tables 18 & 19). The relationship between quantitative completeness and relative abundance is also maintained as in the case of our prior analysis (Figure 5b). However, BoxCarDIA showed remarkable improvements in data completeness even compared to directDIA with all but one protein quantified in all four replicates (Figure 5 a & c). This result shows that the gains in quantitative depth and range provided by better sampling of the ion beam at the MS<sup>1</sup> level

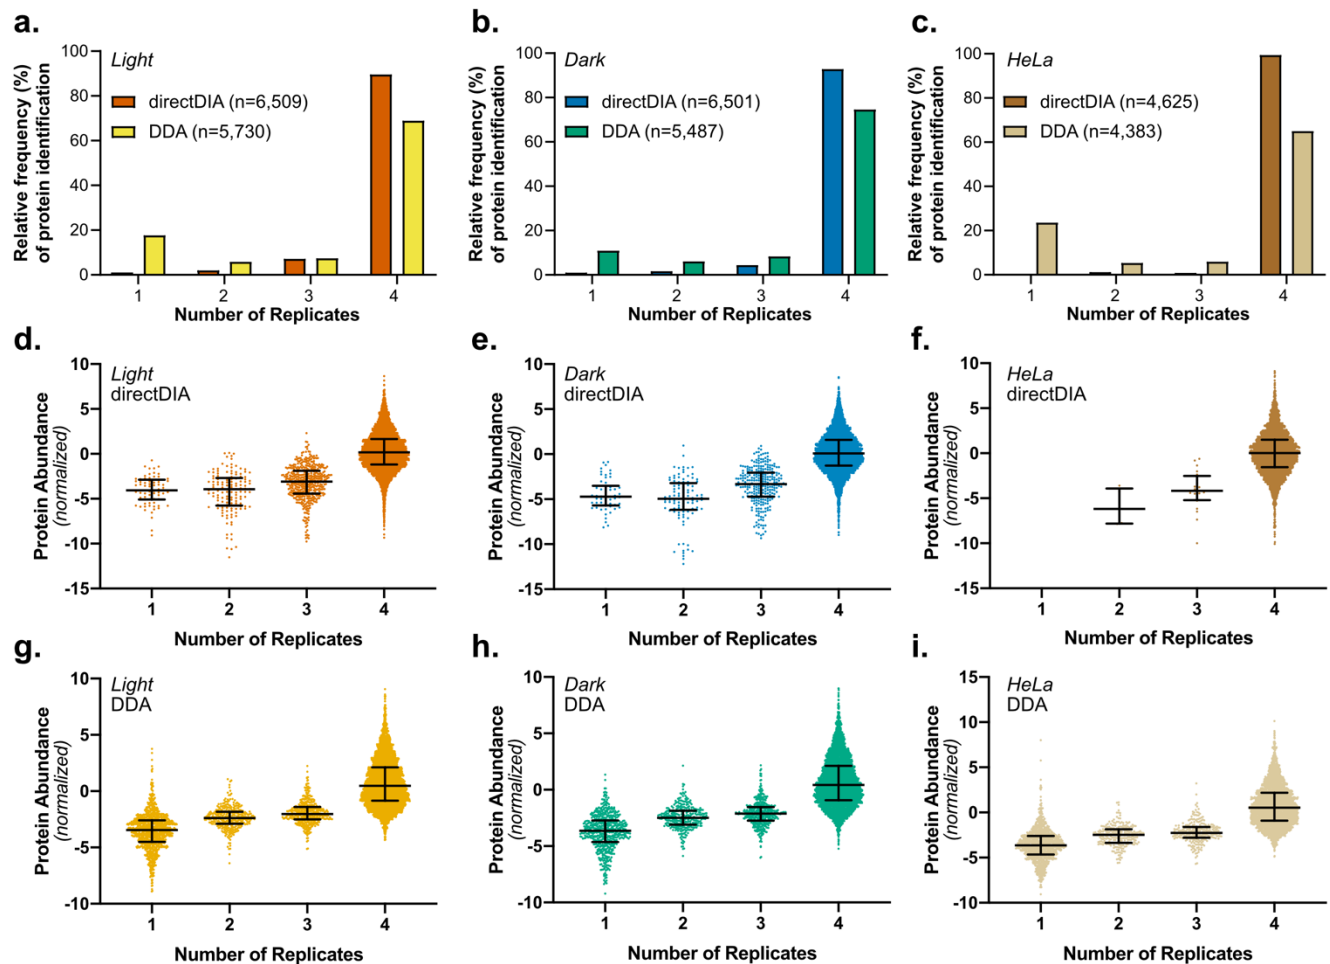

**Figure 4: The DDA missing value problem explains the gap in quantification of low abundant proteins compared to direct DIA. (a.-c.)** Histograms of direct DIA or DDA protein group identifications across replicate samples for light-grown, dark-grown Arabidopsis cells, and HeLa cell digestion standards, respectively. **(d.-i.)** Normalized abundances of proteins binned by the number of replicates containing each protein for direct DIA and DDA. Bars represent median and interquartile range.

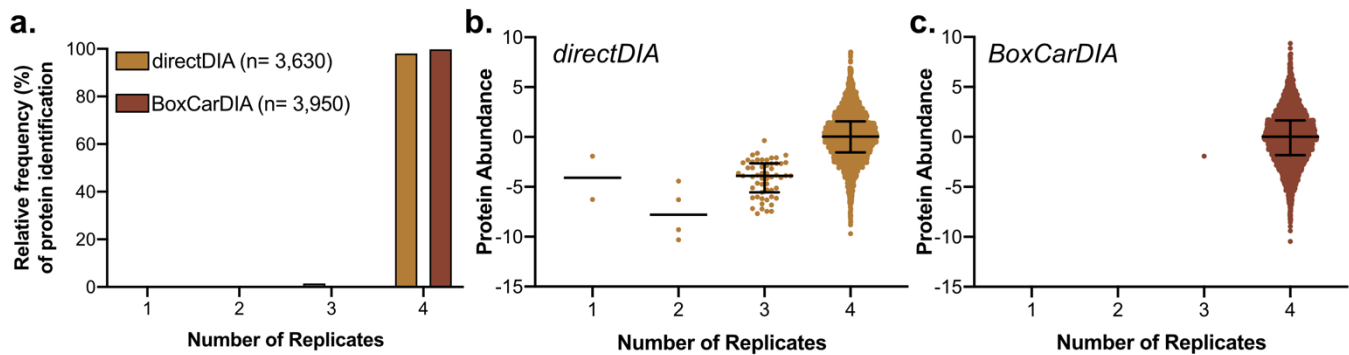

**Figure 5: BoxCarDIA can quantify proteins consistently between independent technical replicate injections.**

(a.) Histograms of BoxCarDIA or directDIA protein group identifications across replicate injections of HeLa cell digestion standards. (b & c.) Normalized abundances of proteins binned by the number of replicates containing each protein for directDIA and BoxCarDIA. Bars represent median and interquartile range.

269  
270

in BoxCarDIA also translate to a complete data matrix, entirely eliminating the long-standing missing-value problem in label-free quantitation.

271  
272  
273  
274  
275  
276  
277  
278  
279  
280  
281  
282  
283  
284  
285  
286  
287  
288  
289  
290  
291  
292  
293  
294  
295  
296

Having systematically investigated the advantages and limitations of BoxCarDIA, directDIA and DDA acquisition for LFQ proteomics, we next performed a differential abundance analysis comparing the proteomes of light- and dark-grown cell cultures quantified in our initial directDIA and DDA experiment. We found 2,089 proteins changing significantly in their abundance (Absolute Log<sub>2</sub>FC > 0.58; q-value < 0.05) in our directDIA analysis and 1,116 proteins changing significantly (Absolute Log<sub>2</sub>FC > 0.58; q-value < 0.05) in DDA analysis. Of these, 710 proteins were found to change significantly in both analyses (Figure 6a). The Log<sub>2</sub> Fold-Change values of these 710 proteins were found to correlate to a high degree between the two analyses (Spearman's R=0.9003), with proteins that were up-regulated in light- vs. dark-grown cells in directDIA analysis also up-regulated in DDA, and vice-versa (Figure 6b). This complete dataset of 2,495 proteins changing significantly in abundance in light- vs dark-grown Arabidopsis cells is a valuable resource for future biochemical studies aiming to use these cell culture systems for protein interactomics experiments and other targeted proteomics analyses (Supplementary Table 20). We also created a functional association network of these proteins by probing previously characterized databases and experiments compiled by StringDB<sup>32</sup>. This network validates our analysis, showing that clusters of proteins involved in photosynthesis, carbon-fixation, starch metabolism and amino-acid metabolism have increased abundance in light- vs. dark-grown cells, as expected (Figure 6c). Interestingly, clusters representing RNA splicing, ER-Golgi transport, ribosome biogenesis, and nuclear translation are all downregulated, while chloroplast translation is upregulated, in light- vs. dark-grown cells (Figure 6c).

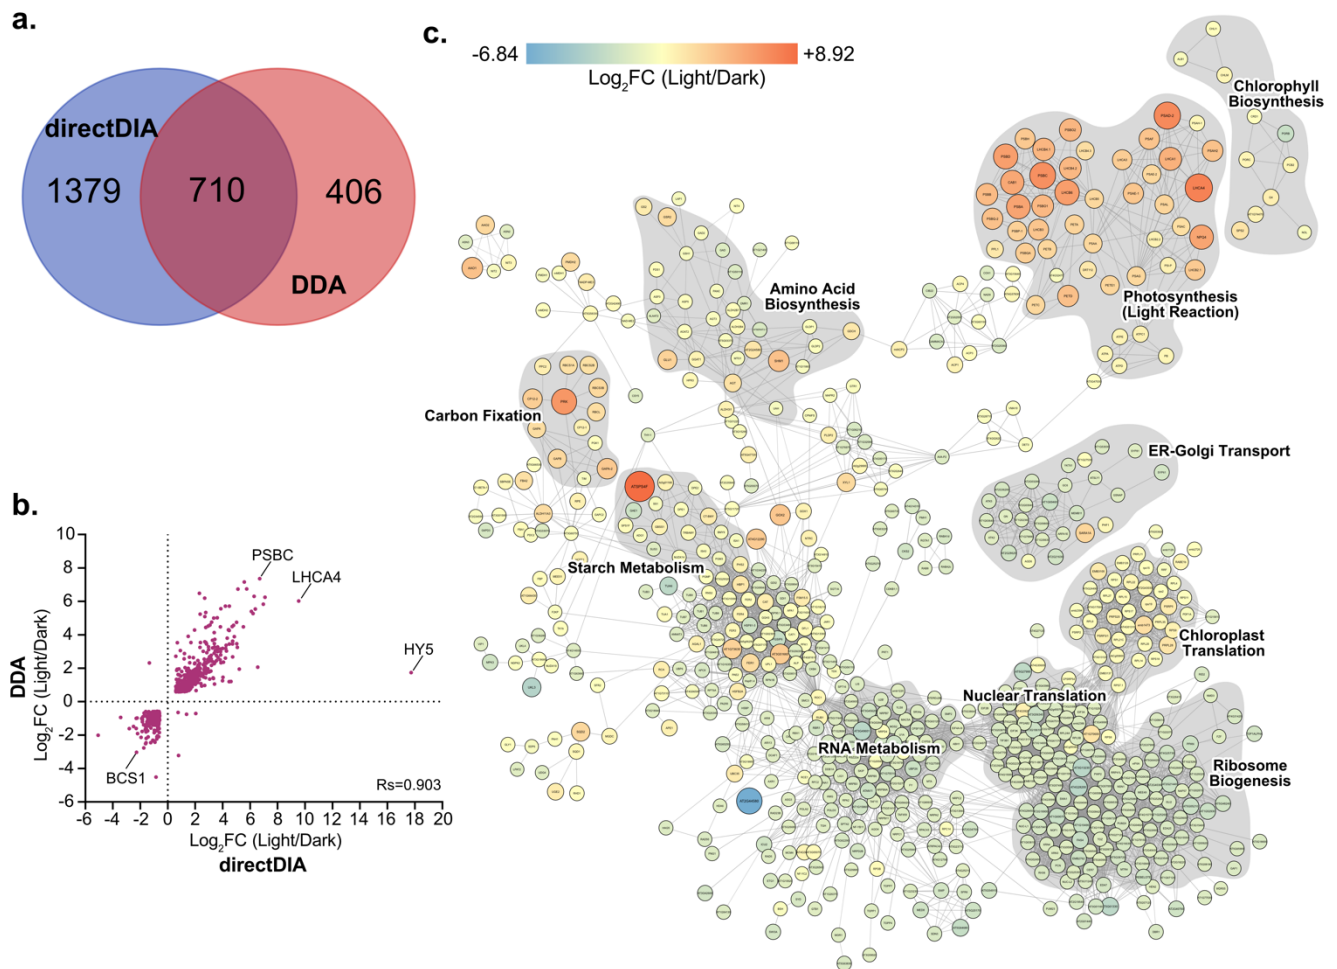

**Figure 6: Differential protein abundance analysis for light- and dark-grown Arabidopsis cells.**

(a.) Venn diagram of protein groups with significantly changing protein abundances ( $q < 0.01$ ;  $\text{Abs Log}_2\text{FC} > 1.5$ ) as measured by direct DIA and DDA. (b.) Scatter plot of significant changes in protein abundance changes based on DDA and direct DIA analysis with selected proteins labeled. (c.) Association network of significantly changing proteins detected with either direct DIA or DDA analysis. Network was constructed based on StringDB database and experiment datasets with a probability cut-off of 0.8. Only nodes with  $> 3$  edges are depicted. Clusters were manually annotated based on GO-terms and KEGG/Reactome pathway membership. Node sizes and color are scaled based on the average  $\text{Log}_2\text{FC}$  (Light/Dark) from DDA and DIA analysis.

PSBC: PHOTOSYSTEM II REACTION CENTER PROTEIN C; LHCA4: LIGHT-HARVESTING CHLOROPHYLL-PROTEIN COMPLEX I SUBUNIT A4; HY5: ELONGATED HYPOCOTYL 5; BCS1: CYTOCHROME BC1 SYNTHESIS

297

## Discussion

298

299

300

301

302

303

304

305

306

Until recently, DDA proteomics (using both label-based and label-free approaches) was clearly the method of choice for functional genomics studies in plants, due to the disadvantages of conventional DIA analysis, such as the requirement for project-specific spectral libraries. Here, we conclusively demonstrate that the newly developed directDIA proteomics approach is a vastly superior technique for plant proteomics as compared to currently used DDA methodologies. We also demonstrate that our novel library-free BoxCarDIA method substantially improves upon gains provided by directDIA. The advantages offered by directDIA and BoxCarDIA include a

307 greater number of protein identifications, more dynamic range, and more  
308 robust protein quantification than DDA, with no change in instrumentation  
309 or increase in instrument analysis time. Our DDA results, even using an  
310 advanced Tribrid Orbitrap-linear ion trap device, show that DDA acquisition  
311 is particularly inconsistent in its quantification of low-abundant proteins  
312 across samples. Similar results have been reported when comparing the  
313 abilities of directDIA and DDA to profile the phosphoproteome (a protein  
314 fraction with high dynamic range) of human tissue and cells<sup>20</sup>. Our finding  
315 that more than 20% of identified proteins in a DDA experiment are found in  
316 only 1 of 4 replicate injections of the same digest, and that these poorly  
317 quantified proteins tend to reside in the lower quartile of protein abundance,  
318 suggests an inherent drawback in DDA that likely plagues previous studies  
319 using this approach, in both label-free and label-based incarnations.  
320 Further, the greater proportion of missing values in light- vs. dark-grown  
321 cells with both DDA and DIA analysis suggests that the effect of ion  
322 suppression is greater in photosynthetically active tissue (**Figure 4 a & b**).

323 The directDIA and BoxCarDIA acquisition methods are compatible with a  
324 wide range of modern mass spectrometers, including older Orbitrap (e.g.,  
325 QExactive Orbitrap mass spectrometers; ThermoScientific) and Triple TOF  
326 devices (Sciex). The various data analyses undertaken in our plant  
327 proteomic study provide a useful template for benchmarking these future  
328 quantitative mass-spectrometry proteomics technologies from an end-  
329 user perspective. While our results demonstrate that segmented MS<sup>1</sup>  
330 analysis through the use of BoxCar windows results in a variety of gains,  
331 there are likely further improvements in BoxCarDIA that may be realised  
332 through the use of better signal processing methods in order to reduce cycle  
333 times<sup>33,34</sup>.

334 In the meantime, our results argue persuasively for the widespread adoption  
335 of library-free BoxCarDIA or directDIA for quantitative LFQ proteomics in  
336 plants. It should be noted that while we utilized proprietary software for  
337 directDIA analysis (Spectronaut v.14, Biognosys AG), multiple free open-  
338 source alternatives exist<sup>12,13,17,18</sup> and proprietary software are often available  
339 to scientists via professional mass-spectrometry facilities. The  
340 demonstrated benefits in reproducibility and dynamic range of BoxCarDIA  
341 could be especially powerful for plant biology studies such as the proteomic  
342 analysis of multiple treatments (e.g., plant nutrition or herbicide studies),  
343 genotypes (e.g. breeding and selection trials), or timepoints (e.g.  
344 chronobiology studies).

## 345 **Methods**

### 346 **Arabidopsis cell culture**

347 Heterotrophic *Arabidopsis thaliana*, cv. Ler suspension cells were obtained  
348 from the Arabidopsis Biological Resource Center (ABRC) and maintained in

349 standard Murashige-Skoog media basal salt mixture (M524; PhytoTech  
350 Laboratories) at 21 °C as previously described<sup>35</sup> under constant light (100  
351  $\mu\text{mol m}^{-2}\text{s}^{-1}$ ) or constant dark. For the generation of experimental samples,  
352 10 mL aliquots of each cell suspension (7 days old) were used to inoculate 8  
353 separate 500 mL flasks that each contained 100 mL of fresh media.  
354 Experimental samples were grown for an additional 5 days prior to  
355 harvesting. Cells were harvested by vacuum filtration and stored at  $-80$  °C.

### 356 **Sample Preparation**

357 Quick-frozen cells were ground to a fine powder under liquid  $\text{N}_2$  using a  
358 mortar and pestle. Ground samples were aliquoted into 400 mg fractions.  
359 Aliquoted samples were then extracted at a 1:2 (w/v) ratio with a solution of  
360 50 mM HEPES-KOH pH 8.0, 50 mM NaCl, and 4% (w/v) SDS. Samples were  
361 then vortexed and placed in a 95°C table-top shaking incubator (Eppendorf)  
362 at 1100 RPM for 15 mins, followed by an additional 15 mins shaking at room  
363 temperature. All samples were then spun at 20,000 x g for 5 min to clarify  
364 extractions, with the supernatant retained in fresh 1.5 mL Eppendorf tubes.  
365 Sample protein concentrations were measured by bicinchoninic acid (BCA)  
366 assay (23225; ThermoScientific). Samples were then reduced with 10 mM  
367 dithiothreitol (DTT) at 95°C for 5 mins, cooled, then alkylated with 30 mM  
368 iodoacetamide (IA) for 30 min in the dark without shaking at room  
369 temperature. Subsequently, 10 mM DTT was added to each sample, followed  
370 by a quick vortex, and incubation for 10 min at room temperature without  
371 shaking.

372 Total proteome peptide pools were generated using a KingFisher Duo  
373 (ThermoScientific) automated sample preparation device as outlined by  
374 Leutert et al. (2019)<sup>36</sup> without deviation. Sample digestion was performed  
375 using sequencing grade trypsin (V5113; Promega), with generated peptide  
376 pools quantified by Nanodrop, acidified with formic acid to a final  
377 concentration of 5% (v/v) and then dried by vacuum centrifugation.  
378 Peptides were then dissolved in 3% ACN/0.1% TFA, desalted using ZipTip  
379 C18 pipette tips (ZTC18S960; Millipore) as previously described<sup>7</sup>, then dried  
380 and dissolved in 3.0% ACN/0.1% FA prior to MS analysis.

381 HeLa proteome analysis was carried out using a HeLa Protein Digest  
382 Standard (88329; Pierce). Four replicate injections of this digest per analysis  
383 type were carried out with the same methods as for Arabidopsis cell samples.

### 384 **Nanoflow LC-MS/MS analysis**

385 Peptide samples were analyzed using a Fusion Lumos Tribrid Orbitrap mass  
386 spectrometer (ThermoScientific) in data dependent acquisition (DDA) and  
387 data independent acquisition (DIA) modes. Dissolved peptides (1  $\mu\text{g}$ ) were  
388 injected using an Easy-nLC 1200 system (LC140; ThermoScientific) and  
389 separated on a 50 cm Easy-Spray PepMap C18 Column (ES803A;  
390 ThermoScientific). The column was equilibrated with 100% solvent A (0.1%

391 formic acid (FA) in water). Common MS settings between DDA and DIA runs  
392 included a spray voltage of 2.2 kV, funnel RF level of 40 and heated capillary  
393 at 300°C. All data were acquired in profile mode using positive polarity with  
394 peptide match off and isotope exclusion selected. All gradients were run at  
395 300 nL/min with analytical column temperature set to 50°C.

396 *DDA acquisition:* Peptides were eluted with a solvent B gradient (0.1% (v/v)  
397 FA in 80% (v/v) ACN): 4% - 41% B (0 - 120 min); 41% - 98% B (120-125  
398 min). DDA acquisition was performed using the Universal Method  
399 (ThermoScientific). Full scan MS<sup>1</sup> spectra (350 - 2000 m/z) were acquired  
400 with a resolution of 120,000 at 200m/z with a normalized AGC Target of  
401 125% and a maximum injection time of 50 ms. DDA MS<sup>2</sup> were acquired in the  
402 linear ion trap using quadrupole isolation in a window of 2.5 m/z. Selected  
403 ions were HCD fragmented with 35% fragmentation energy, with the ion  
404 trap run in rapid scan mode with an AGC target of 200% and a maximum  
405 injection time of 100 ms. Precursor ions with a charge state of +2 - +7 and a  
406 signal intensity of at least 5.0e<sup>3</sup> were selected for fragmentation. All  
407 precursor signals selected for MS/MS were dynamically excluded for 30s.

408 *DIA acquisition:* Peptides were eluted using a segmented solvent B gradient  
409 of 0.1% (v/v) FA in 80% (v/v) ACN from 4% - 41% B (0 - 107 min). DIA  
410 acquisition was performed as per Bekker-Jensen et al. (2020)<sup>20</sup> and  
411 Biognosys AG. Full scan MS<sup>1</sup> spectra (350 - 1400 m/z) were acquired with a  
412 resolution of 120,000 at 200 m/z with a normalized AGC Target of 250% and  
413 a maximum injection time of 45 ms. ACG target value for fragment spectra  
414 was set to 2000%. Twenty-eight 38.5 m/z windows were used with an  
415 overlap of 1 m/z (**Supplementary Table 21**). Resolution was set to 30,000  
416 using a dynamic maximum injection time and a minimum number of  
417 desired points across each peak set to 6.

418 BoxCar DIA acquisition was performed using the same gradient settings as  
419 DIA acquisition outlined above. MS<sup>1</sup> analysis was performed by using two  
420 multiplexed targeted SIM scans of 10 BoxCar windows each. Detection was  
421 performed at 120,000 and normalized AGC targets of 100% per BoxCar  
422 isolation window. Isolation windows used are described in Supplementary  
423 Table 22. Windows were designed using the custom boxcarmaker R script  
424 that divides the MS<sup>1</sup> spectra list into 20 m/z bins, each with an equal number  
425 of precursors, using the equal\_freq function in the funModeling package  
426 (<http://pablo14.github.io/funModeling/>).

427 MS<sup>2</sup> acquisition was performed according to the settings described above for  
428 DIA acquisition.

## 429 **Raw data processing**

430 DDA files were processed using MaxQuant software version 1.6.14<sup>29,30</sup>.  
431 MS/MS spectra were searched with the Andromeda search engine against a  
432 custom made decoyed (reversed) version of the Arabidopsis protein

433 database from Araport 11<sup>37</sup> concatenated with a collection of 261 known  
434 mass spectrometry contaminants. Trypsin specificity was set to two missed  
435 cleavage and a protein and PSM false discovery rate of 1%; respectively.  
436 Minimal peptide length was set to seven and match between runs option  
437 enabled. Fixed modifications included carbamidomethylation of cysteine  
438 residues, while variable modifications included methionine oxidation.

439 DIA files were processed with the Spectronaut directDIA experimental  
440 analysis workflow using default settings without N-acetyl variable  
441 modification enabled. Trypsin specificity was set to two missed cleavages  
442 and a protein and PSM false discovery rate of 1%; respectively. Data filtering  
443 was set to Q-value and global normalization. For comparing BoxCarDIA and  
444 directDIA, the Spectronaut directDIA workflow was used with factory  
445 settings.

446 For hybrid (library- and library-free) DIA analysis, DDA raw files were first  
447 searched with the Pulsar search engine implemented in Spectronaut 14 to  
448 produce a search archive. Next, the DIA files were searched along with this  
449 search archive to generate a spectral library. The spectral library was then  
450 used for normal DIA analysis in Spectronaut 14. Default settings (without N-  
451 acetyl variable modification) were used in all steps. Final optimized  
452 Excalibur method files for DDA, directDIA and BoxCarDIA are provided as  
453 Supplemental Information.

#### 454 **Data analysis**

455 Downstream data analysis for DDA samples was performed using Perseus  
456 version 1.6.14.0<sup>38</sup>. Reverse hits and contaminants were removed, the data  
457  $\log_2$ -transformed, followed by a data sub-selection criterion of n=3 of 4  
458 replicates in at least one sample. Missing values were replaced using the  
459 normal distribution imputation method with default settings to generate a  
460 list of reliably quantified proteins. Subsequently, significantly changing  
461 differentially abundant proteins were determined and corrected for multiple  
462 comparisons (Bonferroni-corrected p-value < 0.05; q-value).

463 DirectDIA and BoxCarDIA data analysis was performed on Spectronaut v.14  
464 using default settings.

465 Statistical analysis and plotting were performed using GraphPad Prism 8.  
466 Network analysis was performed on Cytoscape v.3.8.0 using the StringDB  
467 plugin.

#### 468 **Data availability**

469 Raw data have been deposited to the ProteomeExchange Consortium  
470 (<http://proteomecentral.proteomexchange.org>) via the PRIDE partner  
471 repository with the dataset identifier PXD022448. Source data used to  
472 produce all graphs is provided in the Supplemental Materials. R scripts and  
473 input data used can be downloaded from:

474 <https://github.com/UhrigLab/BoxCarMaker> under a GNU Affero General  
475 Public License 3.0.

## 476 **Acknowledgements**

477 The authors thank Jack Moore (University of Alberta) for assistance with  
478 operating the mass-spectrometer. We are grateful to Fabia Simona and  
479 Oliver Bernhardt (Biognosys AG) for assistance troubleshooting the  
480 Spectronaut software analysis, and to Florian Meier (Max Planck Institute  
481 for Biochemistry) for advice on BoxCar acquisition.

## 482 **Author Information**

### 483 **Affiliations**

484 Department of Biological Sciences, University of Alberta, Edmonton T6G  
485 2E9, Alberta, Canada

486 Devang Mehta, Sabine Scandola, R. Glen Uhrig

### 487 **Contributions**

488 D.M., and R.G.U contributed to Conceptualization, Methodology, and Formal  
489 Analysis. D.M. and S.S. contributed to Investigation. D.M. contributed to  
490 Visualization and Writing (original draft). R.G.U. performed Supervision and  
491 Funding Acquisition. D.M., S.S., and R.G.U contributed to Writing (review &  
492 editing).

### 493 **Corresponding author**

494 Dr. R. Glen Uhrig: [ruhrig@ualberta.ca](mailto:ruhrig@ualberta.ca)

### 495 **Ethics Declarations**

### 496 **Conflict of Interest**

497 The authors declare no conflict of interest  
498



## References

1. Mehta, D. et al. Phosphate and phosphite differentially impact the proteome and phosphoproteome of Arabidopsis suspension cell cultures. *Plant J.* Accepted, (2020).
2. Clark, N. M. et al. Integrated omics networks reveal the temporal signaling events of brassinosteroid response in Arabidopsis. *BioRxiv* (2020). doi:10.1101/2020.09.04.283788
3. Vanderschuren, H. et al. Large-Scale Proteomics of the Cassava Storage Root and Identification of a Target Gene to Reduce Postharvest Deterioration. *Plant Cell* 26, 1913–1924 (2014).
4. Ting, L., Rad, R., Gygi, S. P. & Haas, W. MS3 eliminates ratio distortion in isobaric multiplexed quantitative proteomics. *Nat. Methods* 8, 937–940 (2011).
5. Ow, S. Y. et al. iTRAQ underestimation in simple and complex mixtures: “the good, the bad and the ugly”. *J. Proteome Res.* 8, 5347–5355 (2009).
6. Graf, A. et al. Parallel analysis of Arabidopsis circadian clock mutants reveals different scales of transcriptome and proteome regulation. *Open Biol* 7, (2017).
7. Uhrig, R. G., Schläpfer, P., Roschitzki, B., Hirsch-Hoffmann, M. & Gruissem, W. Diurnal changes in concerted plant protein phosphorylation and acetylation in Arabidopsis organs and seedlings. *Plant J.* 99, 176–194 (2019).
8. Hartl, M. et al. Lysine acetylome profiling uncovers novel histone deacetylase substrate proteins in Arabidopsis. *Mol. Syst. Biol.* 13, 949 (2017).
9. Aebersold, R. & Mann, M. Mass-spectrometric exploration of proteome structure and function. *Nature* 537, 347–355 (2016).
10. Gillet, L. C. et al. Targeted data extraction of the MS/MS spectra generated by data-independent acquisition: a new concept for consistent and accurate proteome analysis. *Mol. Cell Proteomics* 11, O111.016717 (2012).
11. Ludwig, C. et al. Data-independent acquisition-based SWATH-MS for quantitative proteomics: a tutorial. *Mol. Syst. Biol.* 14, e8126 (2018).
12. Tsou, C.-C. et al. DIA-Umpire: comprehensive computational framework for data-independent acquisition proteomics. *Nat. Methods* 12, 258–64, 7 p following 264 (2015).
13. Li, Y. et al. Group-DIA: analyzing multiple data-independent acquisition mass spectrometry data files. *Nat. Methods* 12, 1105–1106 (2015).
14. Biognosys AG. A new era in proteomics: spectral library free data independent acquisition (directDIA). *The Analytical Scientist* (2017).
15. Bruderer, R., Bernhardt, O. M., Gandhi, T. & Reiter, L. High-precision iRT prediction in the targeted analysis of data-independent acquisition and its impact on identification and quantitation. *Proteomics* 16, 2246–2256 (2016).
16. Reiter, L. MP 125: Direct Searching of DIA Data Catches up with Sample-specific Libraries. in *Proceedings of the 68th ASMS Conference on Mass Spectrometry and Allied Topics, Online Meeting (American Society for Mass Spectrometry, 2020)*. at <<https://biognosys.com/media.ashx/mp125lukasreiterasms2020.pdf>>
17. Yang, Y. et al. In silico spectral libraries by deep learning facilitate data-independent acquisition proteomics. *Nat. Commun.* 11, 146 (2020).
18. Demichev, V., Messner, C. B., Vernardis, S. I., Lilley, K. S. & Ralser, M. DIA-NN: neural networks and interference correction enable deep proteome coverage in high throughput. *Nat. Methods* 17, 41–44 (2020).
19. Muntel, J. et al. Surpassing 10 000 identified and quantified proteins in a single run by optimizing current LC-MS instrumentation and data analysis strategy. *Mol. Omics* 15, 348–360 (2019).
20. Bekker-Jensen, D. B. et al. Rapid and site-specific deep phosphoproteome profiling by data-independent acquisition without the need for spectral libraries. *Nat. Commun.* 11, 787 (2020).
21. Meier, F., Geyer, P. E., Virreira Winter, S., Cox, J. & Mann, M. BoxCar acquisition method enables single-shot proteomics at a depth of 10,000 proteins in 100 minutes. *Nat. Methods* 15, 440–448 (2018).
22. Van Leene, J. et al. Capturing the phosphorylation and protein interaction landscape of the plant TOR kinase. *Nat. Plants* 5, 316–327 (2019).
23. Van Leene, J. et al. Targeted interactomics reveals a complex core cell cycle machinery in Arabidopsis thaliana. *Mol. Syst. Biol.* 6, 397 (2010).
24. Gonzalez, N. et al. A repressor protein complex regulates leaf growth in arabidopsis. *Plant Cell* 27, 2273–2287 (2015).
25. Antosz, W. et al. The Composition of the Arabidopsis RNA Polymerase II Transcript Elongation Complex Reveals the Interplay between Elongation and mRNA Processing Factors. *Plant Cell* 29, 854–870 (2017).
26. Dejonghe, W. et al. Disruption of endocytosis through chemical inhibition of clathrin heavy chain function. *Nat. Chem. Biol.* 15, 641–649 (2019).
27. Maronedze, C., Thomas, L., Serrano, N. L., Lilley, K. S. & Gehring, C. The RNA-binding protein repertoire of Arabidopsis thaliana. *Sci. Rep.* 6, 29766 (2016).

28. Arora, D. et al. Establishment of Proximity-dependent Biotinylation Approaches in Different Plant Model Systems. *Plant Cell* (2020). doi:10.1105/tpc.20.00235
29. Cox, J. & Mann, M. MaxQuant enables high peptide identification rates, individualized p.p.b.-range mass accuracies and proteome-wide protein quantification. *Nat. Biotechnol.* 26, 1367–1372 (2008).
30. Tyanova, S., Temu, T. & Cox, J. The MaxQuant computational platform for mass spectrometry-based shotgun proteomics. *Nat. Protoc.* 11, 2301–2319 (2016).
31. Lex, A., Gehlenborg, N., Strobel, H., Vuillemot, R. & Pfister, H. Upset: visualization of intersecting sets. *IEEE Trans Vis Comput Graph* 20, 1983–1992 (2014).
32. Szklarczyk, D. et al. STRING v11: protein-protein association networks with increased coverage, supporting functional discovery in genome-wide experimental datasets. *Nucleic Acids Res.* 47, D607–D613 (2019).
33. Grinfeld, D., Aizikov, K., Kreutzmann, A., Damoc, E. & Makarov, A. Phase-Constrained Spectrum Deconvolution for Fourier Transform Mass Spectrometry. *Anal. Chem.* 89, 1202–1211 (2017).
34. Meier, F. High Dynamic Range Proteome Analysis with BoxCar DIA and Super-Resolution Orbitrap Mass Spectrometry. (2020). at <<http://assets.thermofisher.com/TFS-Assets/CMD/posters/po-65792-ms-proteome-boxcar-dia-orbitrap-asms2020-po65792-en.pdf>>
35. Uhrig, R. G. & Moorhead, G. B. Two ancient bacterial-like PPP family phosphatases from Arabidopsis are highly conserved plant proteins that possess unique properties. *Plant Physiol.* 157, 1778–1792 (2011).
36. Leutert, M., Rodríguez-Mias, R. A., Fukuda, N. K. & Villén, J. R2-P2 rapid-robotic phosphoproteomics enables multidimensional cell signaling studies. *Mol. Syst. Biol.* 15, e9021 (2019).
37. Cheng, C.-Y. et al. Araport11: a complete reannotation of the Arabidopsis thaliana reference genome. *Plant J.* 89, 789–804 (2017).
38. Tyanova, S. et al. The Perseus computational platform for comprehensive analysis of (prote)omics data. *Nat. Methods* 13, 731–740 (2016).

## Supplementary Tables

**Supplementary Table 1:** DDA protein quantification results for Arabidopsis cells

**Supplementary Table 2:** directDIA protein quantification results for Arabidopsis cells

**Supplementary Table 3:** Comparison of protein quantification for Arabidopsis cells between DDA and directDIA

**Supplementary Table 4:** DDA protein quantification results for HeLa digests

**Supplementary Table 5:** directDIA protein quantification results for HeLa digests

**Supplementary Table 6:** BoxCarDIA protein quantification results for Arabidopsis cells

**Supplementary Table 7:** directDIA protein quantification results for Arabidopsis cells in a second experiment for comparison with directDIA

**Supplementary Table 8:** Proteins identified in Arabidopsis cells using DDA

**Supplementary Table 9:** directDIA protein quantification results for Arabidopsis cells filtered for valid values in 3 of 4 replicates.

**Supplementary Table 10:** DDA protein quantification results for Arabidopsis cells with no imputation

**Supplementary Table 11:** directDIA protein quantification results for Arabidopsis cells filtered for valid values in all replicates.

**Supplementary Table 12:** DDA protein quantification results for Arabidopsis cells filtered for valid values in all replicates.

**Supplementary Table 13:** Proteins identified in HeLa digests using DDA

**Supplementary Table 14:** directDIA protein quantification results for HeLa digests filtered for valid values in 3 of 4 replicates.

**Supplementary Table 15:** DDA protein quantification results for HeLa digests with no imputation

**Supplementary Table 16:** directDIA protein quantification results for HeLa digests filtered for valid values in all replicates.

**Supplementary Table 17:** DDA protein quantification results for HeLa digests filtered for valid values in all replicates.

**Supplementary Table 18:** BoxCarDIA protein quantification results for HeLa digests

**Supplementary Table 19:** directDIA protein quantification results for HeLa digests in a second experiment for comparison with BoxCarDIA

**Supplementary Table 20:** Proteins changing significantly in abundance between light and dark-grown Arabidopsis cells, measured using both directDIA and DDA.

**Supplementary Table 21:** Precursor selection mass list table

**Supplementary Table 22:** BoxCar isolation windows

## Supplementary Figures

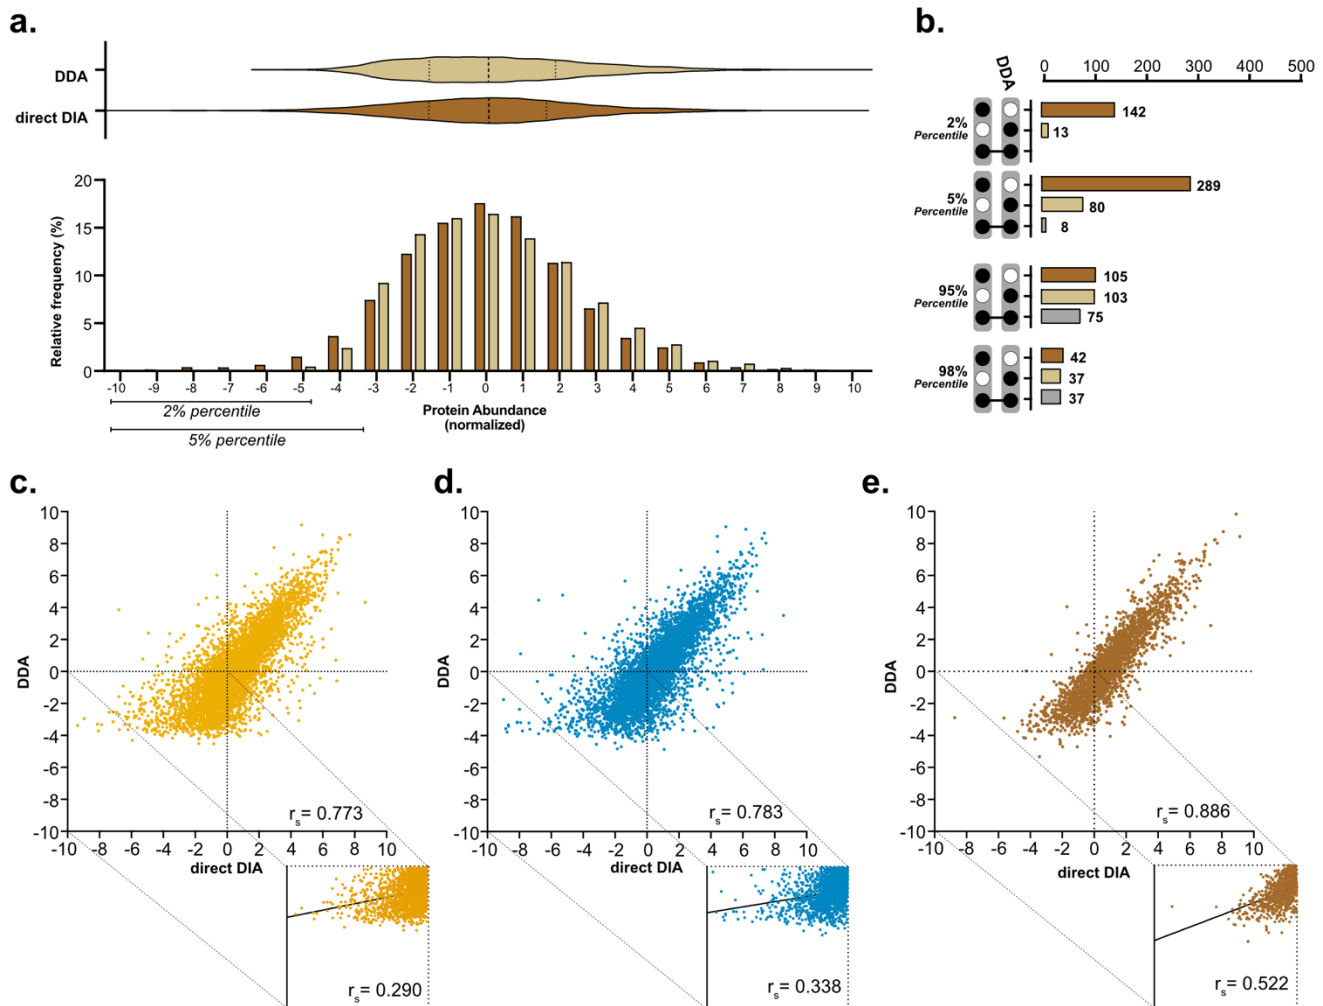

**Figure S1: Comparison of protein quantification results using DDA and directDIA analysis.**

**(a.)** Frequency distribution of normalized protein abundances for DDA and directDIA analysis and corresponding violin plots with median and quartile lines marked for HeLa digests. **(b.)** Upset plots depicting intersections in protein groups quantified by DDA and direct DIA at either extreme of the abundance distribution for HeLa digests. **(c.-e.)** Scatter plots of protein groups quantified by DDA and direct DIA for light-grown Arabidopsis cells, dark-grown Arabidopsis cells, and HeLa digests. Insets show correlations for protein groups with abundances less than the median.

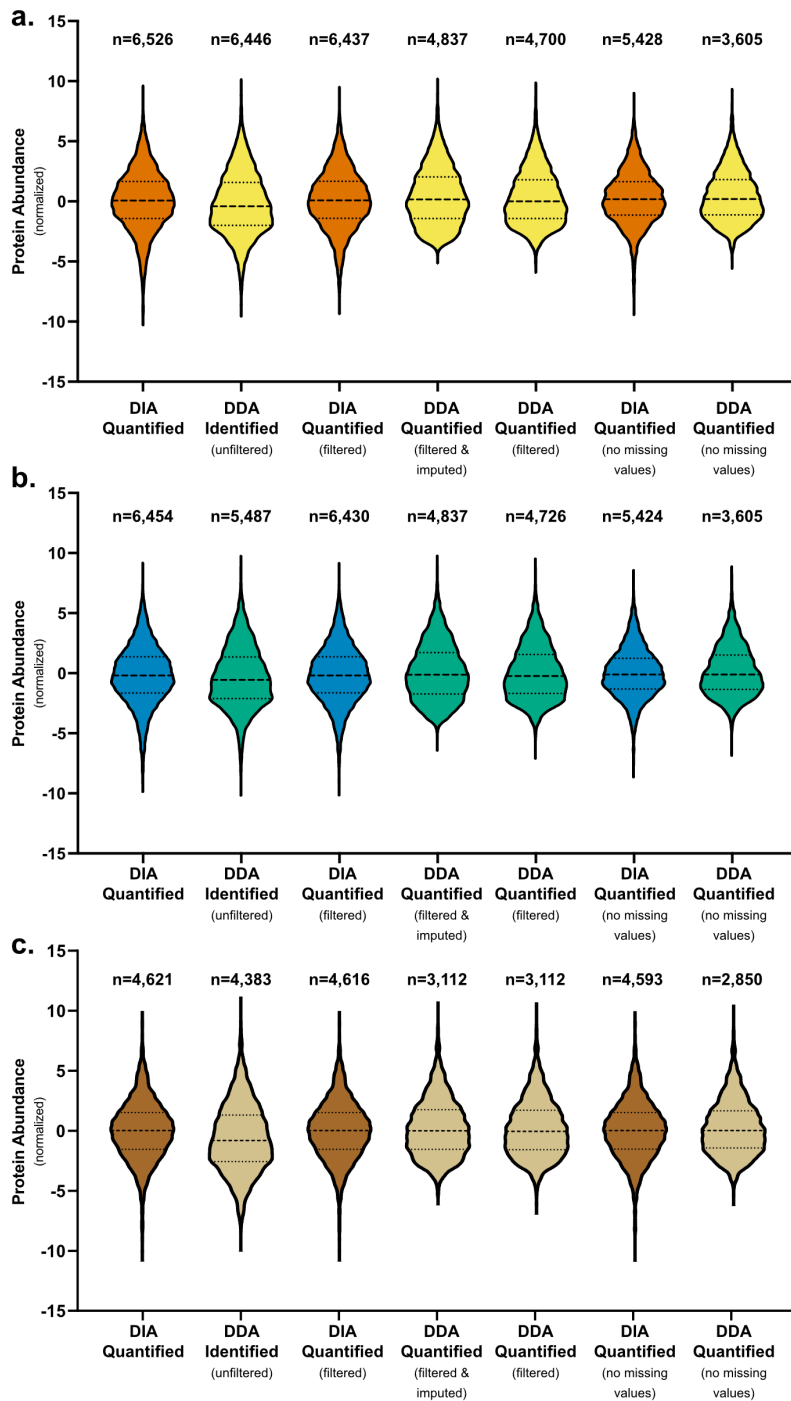

**Figure S2: Protein abundance distributions by analysis type and data filtering settings.**

Violin plots showing normalized protein abundance for proteins quantified by direct DIA (default setting), identified by DDA, quantified by DIA (filtered for protein groups present in at least 3 samples in any one condition), quantified by DDA (filtered for protein groups present in at least 3 samples in any one condition with missing values imputed), quantified by DDA (filtered for protein groups present in at least 3 samples in any one condition with missing values left blank), quantified by DIA (counting only protein groups found in all samples), and quantified by DIA (counting only protein groups found in all samples), respectively for **(a.)** light grown Arabidopsis cells **(b.)** dark grown Arabidopsis cells and **(c.)** HeLa cell digestion standards. (n= number of protein groups).

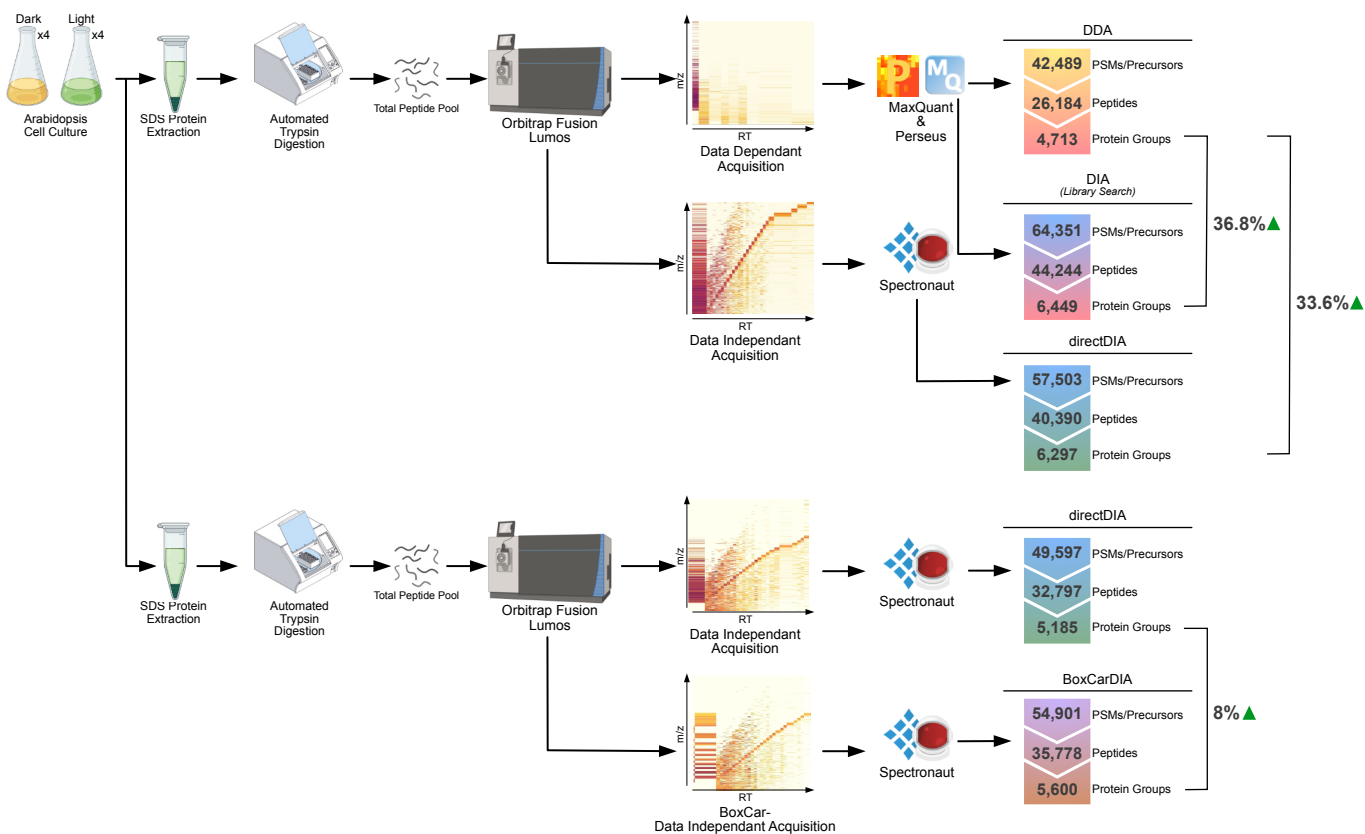

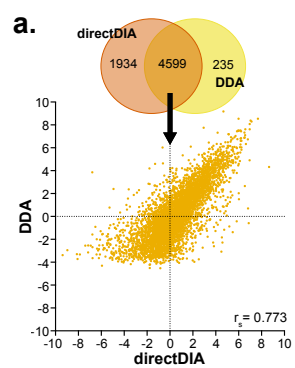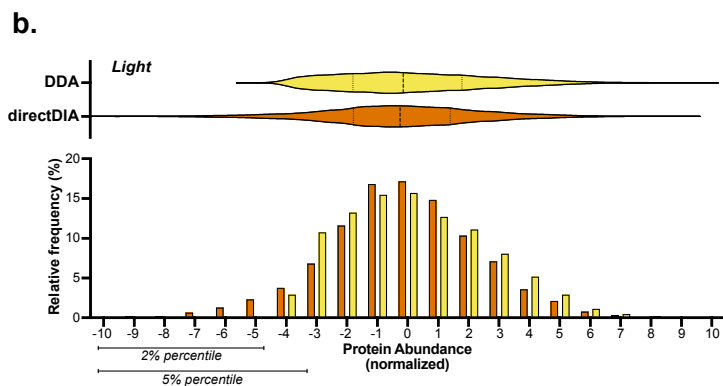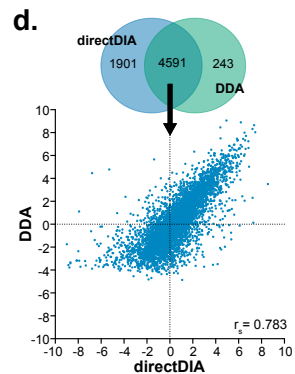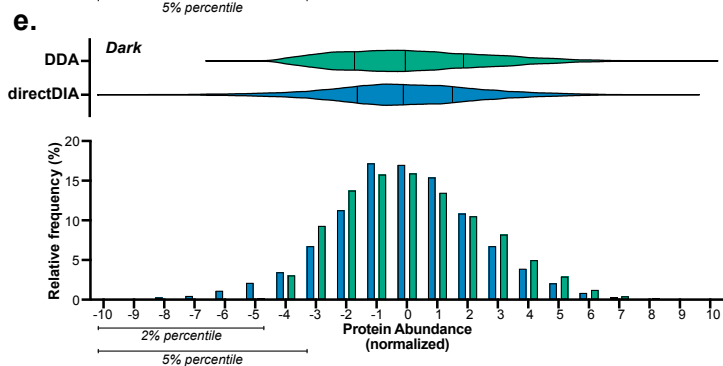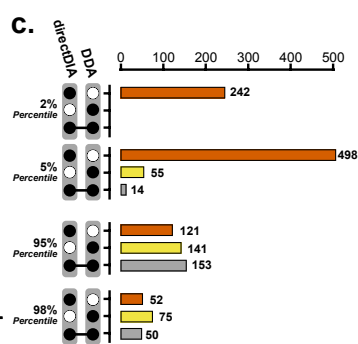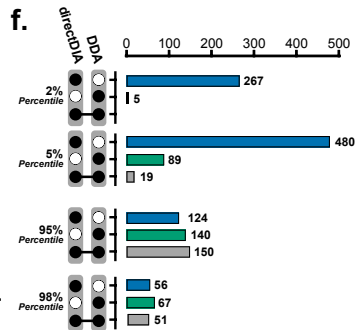

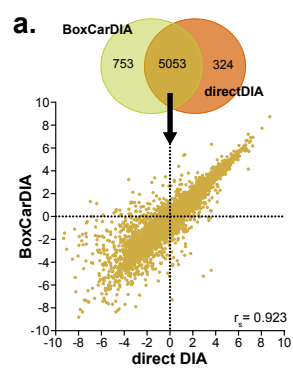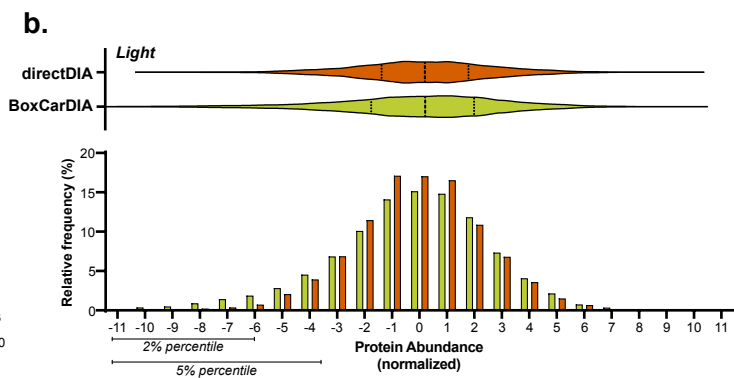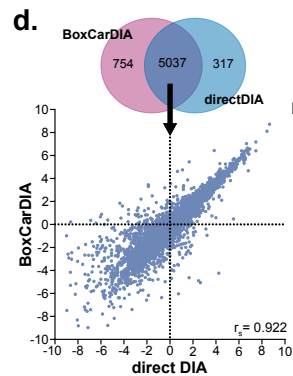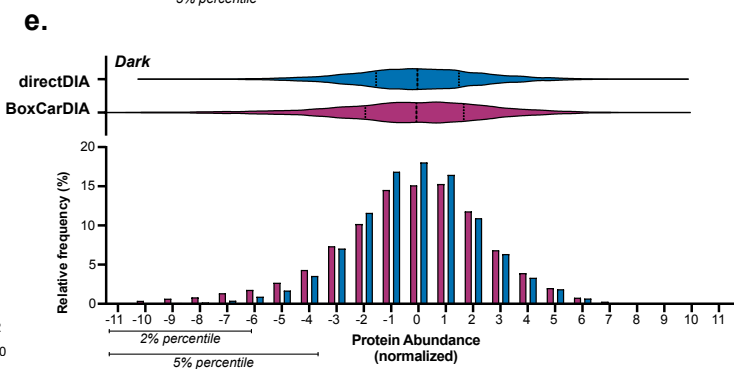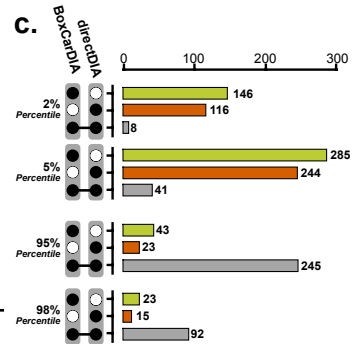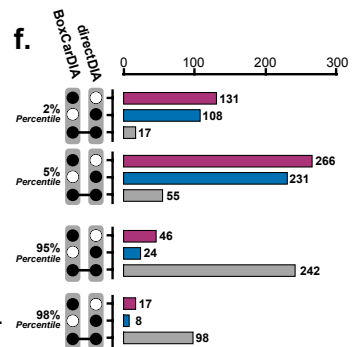



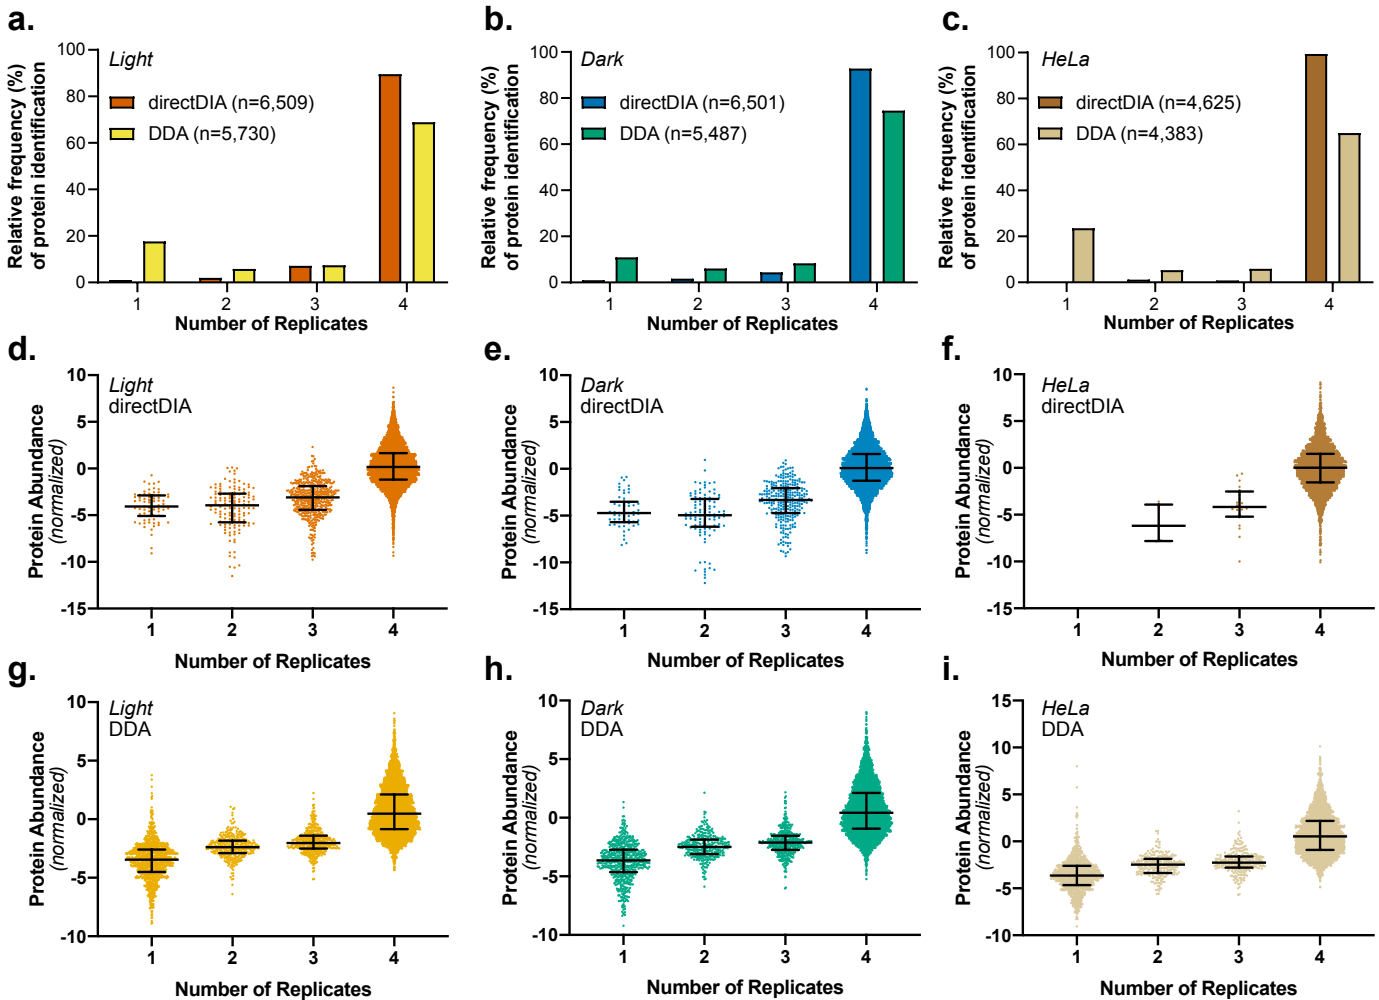

**a.**Relative frequency (%)  
of protein identification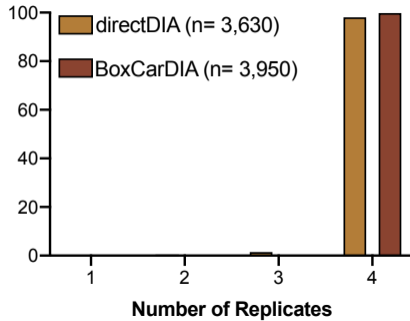**b.**

Protein Abundance

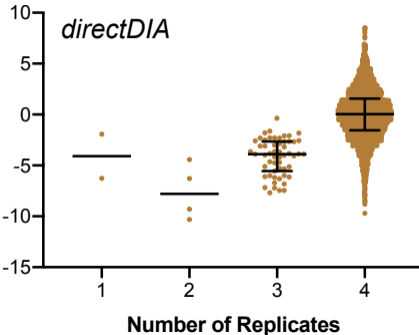**c.**

Protein Abundance

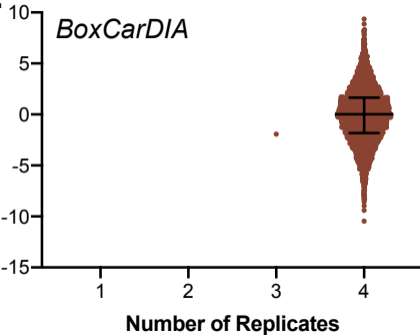

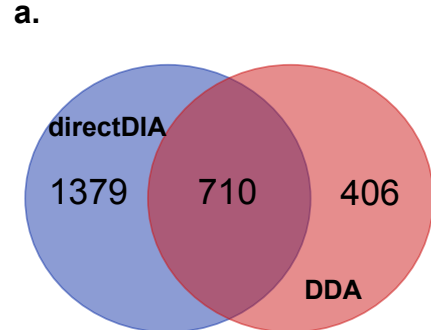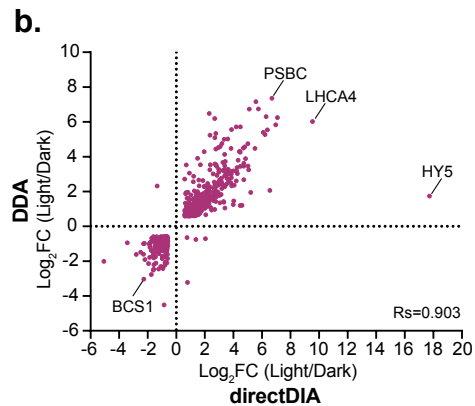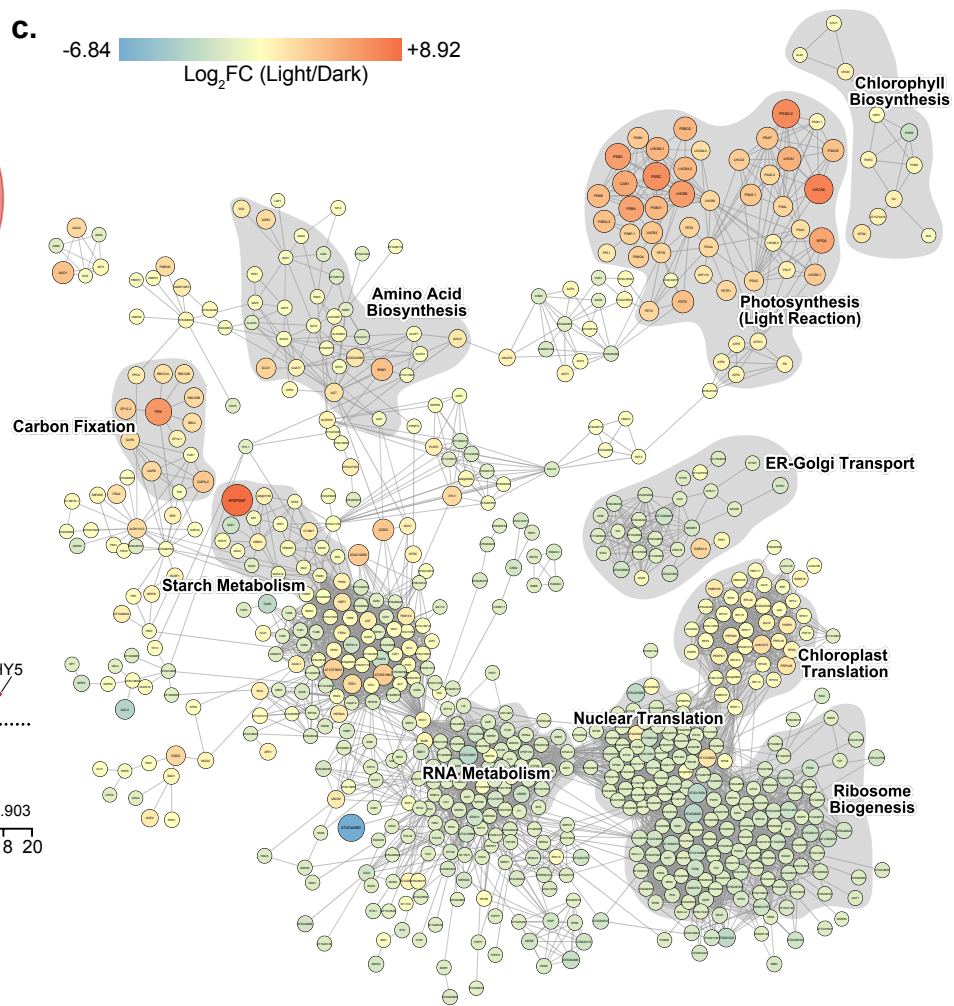

Source: https://www.biorxiv.org/content/biorxiv/early/2021/01/22/2020.11.07.372276.full.pdf
